# Supplementary material for: Oxidative Stress Alters the Profile of Transcription Factors Related to Early Development on In Vitro Produced Embryos
Source: Hindawi journal article supplement (doi:10.1155/2017/1502489), 2017-01-01
Supplement: f1 [file 1502489.f1.pdf]

1 **Supplementary Material - Table I – Taqman assays used for gene expression**  
 2 **evaluation by qRT-PCR**

| Gene                     |                                                                         | ThermoFisher<br>TaqMan code | Gene ID UniGene |
|--------------------------|-------------------------------------------------------------------------|-----------------------------|-----------------|
| <b>ACTB</b>              | actin, beta                                                             | PA5-16914                   | BT.14186        |
| <b>GAPDH</b>             | glyceraldehyde-3-phosphate dehydrogenase                                | Bt03210912_g1               | Bt.87389        |
| <b>PPIA</b>              | Peptidylprolyl Isomerase A                                              | Bt03224617_g1               | Bt.43626        |
| <b>NFE2L2</b>            | Nuclear factor (erythroid-derived 2)-like 2                             | Bt03251880_m1               | BT.17324        |
| <b>KEAP1</b>             | Kelch-like ECH-associated protein 1                                     | Bt03817661_m1               | BT.2184         |
| <b>CAT</b>               | Catalase                                                                | Bt03228713_m1               | BT.48925        |
| <b>SOD1</b>              | superoxide dismutase 1, soluble                                         | Bt03215423_g1               | BT.49637        |
| <b>SOD2</b>              | superoxide dismutase 2, mitochondrial                                   | Bt03244551_m1               | BT.4748         |
| <b>GPX1</b>              | Glutathione Peroxidase 1                                                | Bt03259217_g1               | BT.4317         |
| <b>GPX4</b>              | Glutathione peroxidase 4                                                | Bt03259611_m1               | BT.49234        |
| <b>PRDX1</b>             | Peroxiredoxin-1                                                         | Bt03223684_m1               | BT.65324        |
| <b>HSPA1A</b>            | heat shock 70kDa protein 1A                                             | Bt03292670_g1               | Bt.49659        |
| <b>ARO<br/>(CYP19A1)</b> | aromatase                                                               | Bt03213774_m1               | Bt.4447         |
| <b>HSP90AA1</b>          | Heat Shock Protein 90kDa Alpha                                          | Bt03218068_g1               | Bt.61915        |
| <b>HSPA5</b>             | Heat Shock 70kDa Protein 5                                              | Bt03244883_m1               | Bt.65104        |
| <b>HSPD1</b>             | Heat shock 60kDa protein 1A                                             | Bt04301477_g1               | Bt.24270        |
| <b>ATF4</b>              | Activating transcription factor 4                                       | Bt03221057_m1               | BT.49442        |
| <b>CDX2</b>              | Caudal type homeobox 2                                                  | Bt03649157_m1               | Bt.46244        |
| <b>DDIT3</b>             | DNA-damage-inducible transcript 3                                       | Bt03251320_g1               | BT.65257        |
| <b>NFKB2</b>             | Nuclear Factor Of Kappa Light Polypeptide<br>Gene Enhancer In B-Cells 2 | Bt03272789_g1               | Bt.20288        |
| <b>HAND1</b>             | heart and neural crest derivatives expressed<br>1                       | Bt04318733_g1               | Bt.46230        |
| <b>HSF1</b>              | Heat Shock Transcription Factor 1                                       | Bt03249686_m1               | Bt.61991        |
| <b>OTX2</b>              | Orthodenticle Homeobox 2                                                | Bt04316301_g1               | Bt.87811        |
| <b>PAF1</b>              | RNA Polymerase II Associated Factor                                     | Bt03239371_g1               | BT.13382        |
| <b>REST</b>              | RE1-silencing transcription factor                                      | Bt03278318_s1               | BT.86225        |
| <b>SREBF1</b>            | Sterol Regulatory Element Binding<br>Transcription F1                   | Bt03276370_m1               | Bt.15667        |
| <b>XBP1</b>              | X-Box Binding Protein 1                                                 | Bt03227621_g1               | Bt.89117        |
| <b>DNMT1</b>             | DNA (Cytosine-5-)-Methyltransferase 1                                   | Bt03224737_m1               | BT.108052       |
| <b>DNMT3A</b>            | DNA (Cytosine-5-)-Methyltransferase 3A                                  | Bt01027164_m1               | BT.64560        |
| <b>DNMT3B</b>            | DNA (Cytosine-5-)-Methyltransferase 3B                                  | Bt03259810_m1               | BT.22977        |
| <b>HP1</b>               | Heterochromatin protein 1                                               | Bt03246076_m1               | BT.22333        |
| <b>NANOG</b>             | Nanog homeobox                                                          | Bt03220541_m1               | BT.47449        |
| <b>POU5F1<br/>(OCT4)</b> | POU class 5 homeobox 1                                                  | Bt03223846_g1               | BT.92603        |
| <b>SOX2</b>              | SRY (sex determining region Y)-box 2                                    | Bt03278318_s1               | BT.103364       |
| <b>H1F1A</b>             | Hypoxia inducible factor 1 (transcription<br>factor)                    | Bt03259341_m1               | BT.4184         |

| Gene           |                                                 | ThermoFisher<br>TaqMan code | Gene ID UniGene |
|----------------|-------------------------------------------------|-----------------------------|-----------------|
| <b>MAPK1</b>   | Mitogen-Activated Protein Kinase                | Bt03216718_g1               | Bt.109487       |
| <b>EGFR</b>    | epidermal growth factor receptor                | -                           | Bt.6422         |
| <b>IGF1R</b>   | Insulin-Like Growth Factor 1 Receptor           | Bt03649217_m1               | Bt.12759        |
| <b>IGFBP2</b>  | Insulin-Like Growth Factor Binding Protein 2    | Bt01040719_m1               | Bt.149          |
| <b>IGFBP4</b>  | Insulin-Like Growth Factor Binding Protein 4    | Bt03259500_m1               | Bt.5237         |
| <b>IFITM3</b>  | Interferon Signaling                            | Bt03292973_g1               | Bt.32359        |
| <b>IFNT2</b>   | interferon tau                                  | Bt03210579_g1               | Bt.328          |
| <b>PLAC8</b>   | placenta-specific 8                             | Bt03211579_m1               | Bt.64679        |
| <b>GSK3A</b>   | Glycogen Synthase Kinase 3a                     | Bt03273698_g1               | Bt.33944        |
| <b>HMOX1</b>   | Heme oxygenase                                  | Bt03218624_m1               | Bt.4001         |
| <b>VEGFA</b>   | Vascular Endothelial Growth Factor A            | Bt03213282_m1               | Bt.4138         |
| <b>BAX</b>     | BCL2-Associated X Protein                       | Bt03211777_g1               | Bt.109788       |
| <b>CASP9</b>   | Caspase 9, apoptosis-related cysteine peptidase | Bt04282453_m1               | Bt.66332        |
| <b>CASP3</b>   | caspase 3, apoptosis-related cysteine peptidase | Bt03250954_g1               | Bt.10084        |
| <b>CDH1</b>    | cadherin 1                                      | Bt03210093_g1               | Bt.64827        |
| <b>MORF4L2</b> | mortality factor 4 like 2                       | Bt03270996_m1               | Bt.26405        |
| <b>ACACA</b>   | Acetyl-CoA carboxylase                          | Bt03213360_m1               | Bt.88312        |
| <b>ACSL3</b>   | Acyl-CoA Synthetase 3                           | Bt04282138_m1               | Bt.89521        |
| <b>ACSL6</b>   | Acyl-CoA Synthetase 6                           | Bt03231692_m1               | Bt.11904        |
| <b>ELOVL6</b>  | Fatty acid elongase 6                           | Bt00907566_m1               | Bt.2073         |
| <b>FADS2</b>   | Fatty acid desaturase 2                         | Bt03256255_g1               | Bt.3891         |
| <b>FASN</b>    | Fatty acid synthase                             | Bt03210471_g1               | Bt.30099        |
| <b>SCD</b>     | Stearoyl-CoA desaturase                         | Bt04307477_m1               | Bt.65021        |
| <b>AUH</b>     | AU RNA binding protein                          | Bt03275798_m1               | Bt.92325        |
| <b>AQP3</b>    | aquaporin 3                                     | Bt03253663_m1               | Bt.53350        |
| <b>PFKP</b>    | Phosphofructokinase                             | Bt04316551_m1               | Bt.3794         |
| <b>PGK1</b>    | Phosphoglycerate Kinase 1                       | Bt03225854_mH               | Bt.37560        |
| <b>SLC2A1</b>  | Solute Carrier Family 2 Member 1                | Bt03215313_m1               | Bt.4646         |
| <b>SLC2A3</b>  | Solute Carrier Family 2 Member 3                | Bt03259513_g1               | Bt.3964         |
| <b>SLC2A5</b>  | Solute Carrier Family 2 Member 5                | Bt03258299_g1               | Bt.19805        |
| <b>AKR1B1</b>  | Aldo-Keto Reductase Family 1, Member B1         | Bt03218049_g1               | Bt.63116        |
| <b>G6PD</b>    | Glucose 6 phosphate dehydrogenase               | Bt03649181_m1               | Bt.65227        |

3 Assays used were separated into the following categories:

- Housekeeping genes
- Oxidative stress and response to cellular stress;
- DNA-dependent transcription factors;
- Related to epigenetic factors;
- Related to pluripotency and cell differentiation;
- Related to embryo development and cell proliferation;
- Related to apoptosis;
- Related to metabolism;

5 **Supplementary Material - Table II – Genes with difference between the 5%O<sub>2</sub> and**  
6 **20%O<sub>2</sub> groups separated by functional pathways**

| Functional Pathways                                                                                                                                      | Genes                                                                                                                                                              |
|----------------------------------------------------------------------------------------------------------------------------------------------------------|--------------------------------------------------------------------------------------------------------------------------------------------------------------------|
| Redox process in response to oxidative stress                                                                                                            | <i>KEAP1 DDIT3 HMOX1</i><br><i>NFE2L2 ARO (CYP19A1) CAT GXP1</i><br><i>PRDX1 SOD1 SOD2</i>                                                                         |
| Response to cellular stress and DNA damage repair                                                                                                        | <i>DDIT3</i><br><i>HSP90AA1 HSPD1 MORF4L2 SOD2</i>                                                                                                                 |
| DNA-dependent transcription factors<br>(processes that regulate frequency, rate and extent of DNA transcription)                                         | <i>ATF4 CDX2 DDIT3 KEAP1 HSF1</i><br><i>OTX2 PAF1 POU5F1 (OCT4)</i><br><i>REST SREBF1 XBP1</i><br><i>HAND1 NANOG NFKB2 SOD2 SOX2</i>                               |
| Positive regulation of gene expression                                                                                                                   | <i>ATF4 DDIT3 KEAP1 SREBF1</i>                                                                                                                                     |
| Negative regulation of gene expression                                                                                                                   | <i>REST</i><br><i>HAND1 NANOG SOX2</i>                                                                                                                             |
| DNA-dependent transcription factors with specific binding                                                                                                | <i>DDIT3 ATF4 HSF1</i><br><i>POU5F1 (OCT4) OTX2</i><br><i>NANOG NFKB2 SOX2</i>                                                                                     |
| RNA metabolic process regulators<br>(processes that regulate frequency, rate and extent of chemical reactions involving RNA)                             | <i>ATF4 DDIT3 CDX2 HSF1</i><br><i>POU5F1 (OCT4) OTX2 XBP1</i><br><i>HAND1 NANOG NFKB2 SOD2 SOX2</i>                                                                |
| Chromatin and histone modification and DNA methylation                                                                                                   | <i>ATF4 DDIT3 REST</i><br><i>HAND1 HP1 MORF4L2 SOX2</i>                                                                                                            |
| Regulation of pluripotency                                                                                                                               | <i>CDX2 PAF1 POU5F1 (OCT4) REST</i><br><i>NANOG SOX2</i>                                                                                                           |
| Regulation of cell differentiation                                                                                                                       | <i>CDX2</i><br><i>NANOG SOX2</i>                                                                                                                                   |
| Regulation of TE differentiation process                                                                                                                 | <i>CDX2</i><br><i>HAND1 MAPK1</i>                                                                                                                                  |
| Regulation of embryo development (blastocyst)                                                                                                            | <i>CDX2 HSF1 KEAP1 OTX2</i><br><i>HAND1 MAPK1 NFKB2</i>                                                                                                            |
| Regulation of cell proliferation rate                                                                                                                    | <i>EGFR GSK3A HSF1</i><br><i>MAPK1 PLAC8*</i>                                                                                                                      |
| Regulation of apoptosis                                                                                                                                  | <i>DDIT3</i><br><i>BAX CASP3 HSPD1 MORF4L2 PLAC8*</i>                                                                                                              |
| Regulation of cellular metabolism<br>(sugars, amino acids, protein folding processes and protein activities regulation, fatty acid biosynthetic process) | <i>ACACA ATF4 EGFR FADS2 FASN</i><br><i>G6PD GSK3A HMOX1 HSF1</i><br><i>KEAP1 SCD SLC2A3 SREBF1</i><br><i>ACSL3 BAX ELOVL6 HSP90AA1</i><br><i>HSPD1 MAPK1 PGK1</i> |

7 Genes in **blue**: up-regulated in the 5%O<sub>2</sub> group in comparison to the 20%O<sub>2</sub> group  
8 Genes in **red**: down-regulated in the 5%O<sub>2</sub> group in comparison to the 20%O<sub>2</sub> group  
9 (\*) Detected only in the 20%O<sub>2</sub> group.

11 **Supplementary Material - Table III – P value of the genes with relative difference**  
 12 **between the 5%O<sub>2</sub> and 20%O<sub>2</sub> groups (in alphabetical order).**  
 13

| Gene                 | P value | Gene                 | P value  |
|----------------------|---------|----------------------|----------|
| <i>ACACA</i>         | 0.011   | <i>HSPD1</i>         | 0.0109   |
| <i>ACSL3</i>         | 0.0244  | <i>KEAP1</i>         | 0.014    |
| <i>ARO (CYP19A1)</i> | 0.0165  | <i>MAPK1</i>         | 0.0044   |
| <i>ATF4</i>          | 0.0004  | <i>MORF4L2</i>       | 0.0107   |
| <i>BAX</i>           | 0.0233  | <i>NANOG</i>         | 0.0156   |
| <i>CASP3</i>         | 0.0268  | <i>NFE2L2</i>        | 0.0343   |
| <i>CAT</i>           | 0.0004  | <i>NFKB2</i>         | 0.0105   |
| <i>CDX2</i>          | 0.0131  | <i>OTX2</i>          | 0.0146   |
| <i>DDIT3</i>         | 0.0232  | <i>PAF1</i>          | 0.0076   |
| <i>EGFR</i>          | 0.0049  | <i>PGK1</i>          | 0.0319   |
| <i>ELOVL6</i>        | 0.0127  | <i>PLAC8*</i>        | < 0.0001 |
| <i>FADS2</i>         | 0.0048  | <i>POU5F1 (OCT4)</i> | 0.003    |
| <i>FASN</i>          | 0.0125  | <i>PRDX1</i>         | 0.0023   |
| <i>G6PD</i>          | 0.0106  | <i>REST</i>          | 0.0002   |
| <i>GPX1</i>          | 0.0128  | <i>SCD</i>           | 0.0008   |
| <i>GSK3A</i>         | 0.004   | <i>SLC2A3</i>        | 0.0221   |
| <i>HAND1</i>         | 0.0119  | <i>SOD1</i>          | 0.001    |
| <i>HMOX1</i>         | 0.0016  | <i>SOD2</i>          | 0.0039   |
| <i>HP1</i>           | 0.0243  | <i>SOX2</i>          | 0.0005   |
| <i>HSF1</i>          | 0.0116  | <i>SREBF1</i>        | 0.0009   |
| <i>HSP90AA1</i>      | 0.0225  | <i>XBP1</i>          | 0.0042   |

14 (\*) Detected only in the 20%O<sub>2</sub> group  
 15
